# Supplementary material for: Ras drives malignancy through stem cell crosstalk with the microenvironment
Source: PubMed Central journal article supplement (PMC9750880; doi:10.1038/s41586-022-05475-6), 2022-11-30
Supplement: 41586_2022_5475_MOESM1_ESM.pdf [file 41586_2022_5475_MOESM1_ESM.pdf]

---

**Supplementary information**

---

**Ras drives malignancy through stem cell  
crosstalk with the microenvironment**

---

In the format provided by the  
authors and unedited

## SI Guide

### **Ras drives malignancy through stem cell crosstalk with the microenvironment**

Shaopeng Yuan<sup>1</sup>, Katherine S. Stewart<sup>1</sup>, Yihao Yang<sup>1</sup>, Merve Deniz Abdusselamoglu<sup>1</sup>, S. Martina Parigi<sup>1</sup>, Tamar Y. Feinberg<sup>1,2</sup>, Karen Tumaneng<sup>1,3</sup>, Hanseul Yang<sup>1,4</sup>, John M. LeVorse<sup>1,5</sup>,  
Lisa Polak<sup>1</sup>, David Ng<sup>1</sup>, Elaine Fuchs<sup>1,6,\*</sup>

<sup>1</sup>Robin Chemers Neustein Laboratory of Mammalian Cell Biology and Development, The Rockefeller University, New York, NY 10065, USA

<sup>2</sup>Present address: Volastra Therapeutics, New York, NY 10027, USA

<sup>3</sup>Present address: Sanofi, Cambridge, MA 02141, USA

<sup>4</sup>Present address: Department of Biological Sciences, Korea Advanced Institute of Science and Technology, 34141, Korea

<sup>5</sup>Present address: Temple University, Philadelphia, PA 19122 USA

<sup>6</sup>Howard Hughes Medical Institute, New York, NY 10065, USA

\*Corresponding author in print: [fuchslb@rockefeller.edu](mailto:fuchslb@rockefeller.edu)

Correspondence with the editors during the review process: [fuchs@rockefeller.edu](mailto:fuchs@rockefeller.edu)

## **Table of Contents**

**SI Figure 1 | Uncropped immunoblots from Main Figures.** **a**, Immunoblots for Fig. 2e showing that cultured HRAS<sup>G12V</sup> keratinocytes (KT) that are wild type (FF) but not mutant ( $\Delta\Delta$ ) for the TGF $\beta$  receptor gene (*Tgfbr2*) elevate LEPR dramatically in response to active recombinant TGF $\beta$ 1. GAPDH is used as the loading control. Due to the usage of fluorescent secondary antibodies, they were run on different gels with identical amounts (20 $\mu$ g) of the same processed samples. **b**, For Fig. 5d and 5g, immunoblots of proteins isolated from *Lepr<sup>null</sup>* and *Lepr<sup>Ctrl</sup>* SCC cells treated with recombinant leptin or vehicle control for 48 hr prior to analyses. They show that leptin-dependent activation of pAKT in LEPR<sup>+</sup> cells, as well as higher overall levels of AKT, so do pS6K and pS6 as the hallmark of mTOR signalling. . GAPDH is used as the loading control. Due to the large number of targets to analyse, they were run on different gels with identical amounts (20 $\mu$ g) of the same processed samples.

**SI Figure 2 | Uncropped immunoblots from Extended Data Figures.** **a**, Immunoblots for Extended Data Fig. 5b showing that *Lepr<sup>null</sup>* PDVC57 SCC cells (Clone 2) generated by targeted CRISPR/CAS9 technology have a complete loss of LEPR, which was selected for the study. GAPDH is used as the loading control. They were run on the same gel. **b**, Immunoblots for Extended Data Fig. 5d showing *Lepr<sup>null</sup>* SCC cells transduced with either *TRE-Lepr<sup>FL</sup>* or *TRE-Lepr<sup>ΔSig</sup>* are validated with pan-LEPR analyses.  $\alpha$ -Tubulin is used as the loading control. They were run on the same gel.

**SI Figure 3 | FACS gating strategies for SCC cells for scRNAseq.** FACS strategies for isolating basal progenitors from papilloma and SCCs, respectively ( $\alpha 6^{\text{hi}}\beta 1^{\text{hi}}\text{CD}44^+$ ) that are either high or negative for TGF $\beta$  reporter mCherry. Papillomas and SCCs were analysed according to timing and pre-screened for pathology prior to FACS.

**SI Figure 4 | FACS gating strategies for normal and cancer basal cells.** FACS strategies for isolating basal progenitors from (top) normal telogen-phase skin ( $\alpha 6^{\text{hi}}\beta 1^+$ ), inclusive of interfollicular epidermal SCs, upper hair follicle and sebaceous gland SCs and bulge HFSCs; and from (middle and bottom) papilloma and SCCs, respectively ( $\alpha 6^{\text{hi}}\beta 1^+\text{CD}44^+$ ). Papillomas and SCCs are analysed according to timing and prescreened for pathology prior to FACS. For high throughput RNA sequencing, two independent replicates of FACS-isolated cells are used for each condition. Note also that for all other experiments performed on FACS-purified cells, the gating stringency is raised to  $5 \times 10^3$  for CD29 ( $\beta 1$ ) and CD49f ( $\alpha 6$ ).

### **Supplementary Table 1 to 5 (uploaded as separate Excel files)**

**Supplementary Table 1:** Significantly up-regulated genes in normal versus tumour basal progenitor cells (TPMs per Sample)

**Supplementary Table 2:** Significantly up-regulated genes in papilloma versus SCC basal progenitor cells (TPMs per Sample)

**Supplementary Table 3:** Genes enriched for cluster C2 expression (relative to clusters C1 and C3) as TPMs

**Supplementary Table 4:** Significantly Up-regulated CSC genes by TGF $\beta$  responding tumour basal cells versus TGF $\beta$  non-responding tumour basal cell (TPMs per Sample)

**Supplementary Table 5:** Significantly Up-regulated genes that are unique in SCC-CSC (TPMs per Sample)

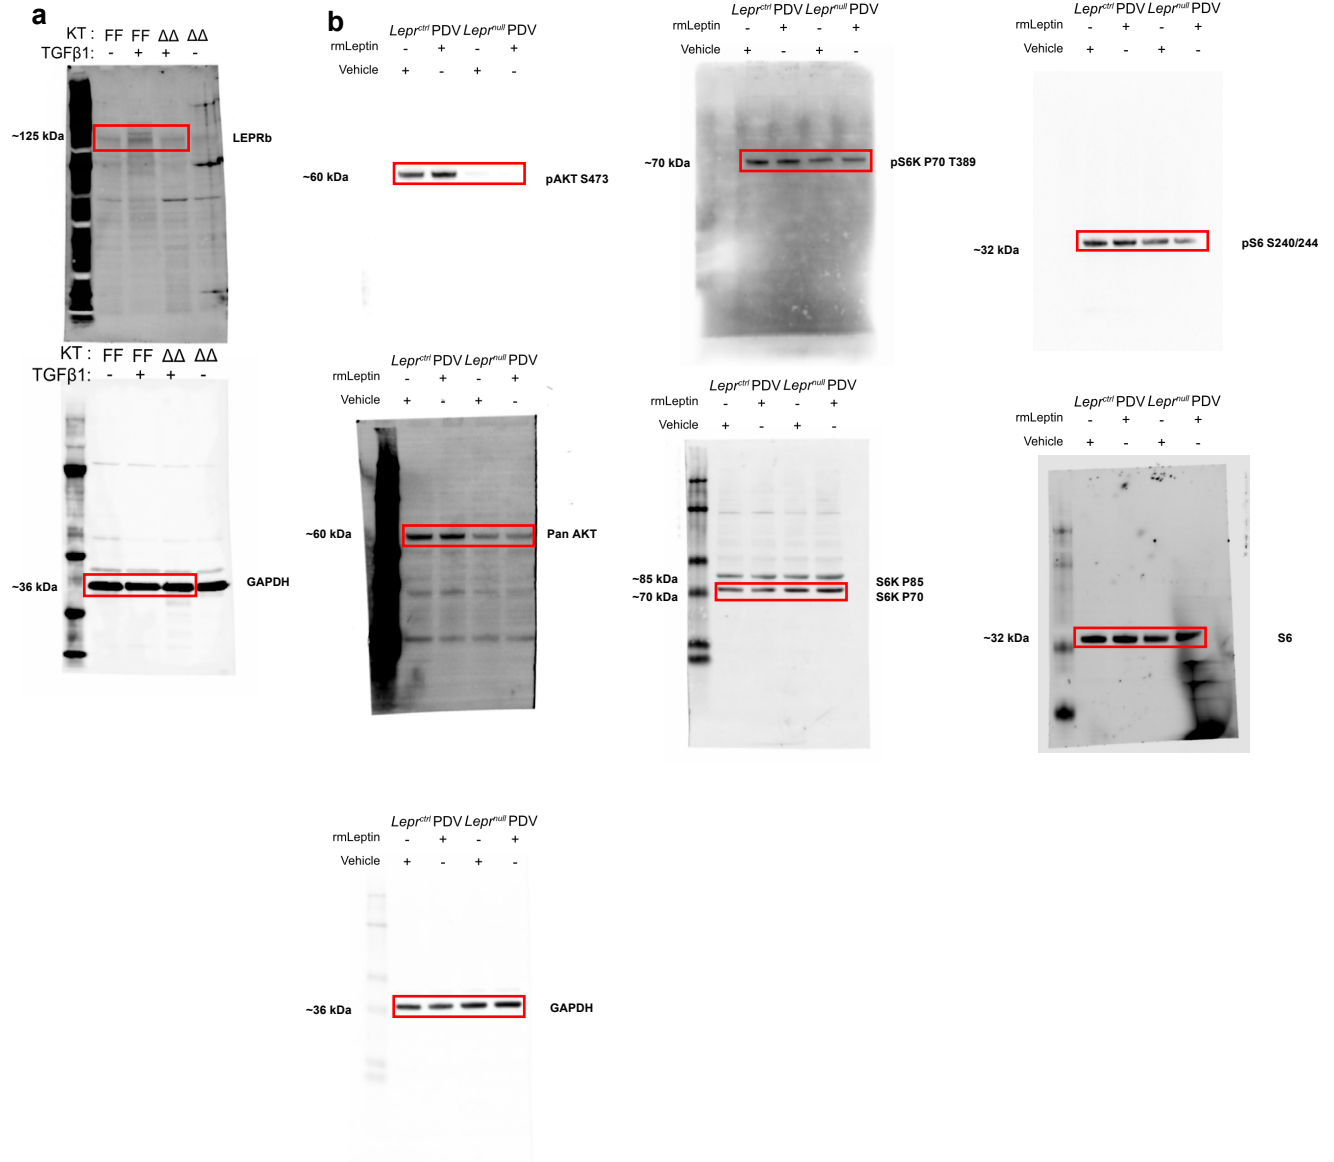

Supplementary Information Figure 1

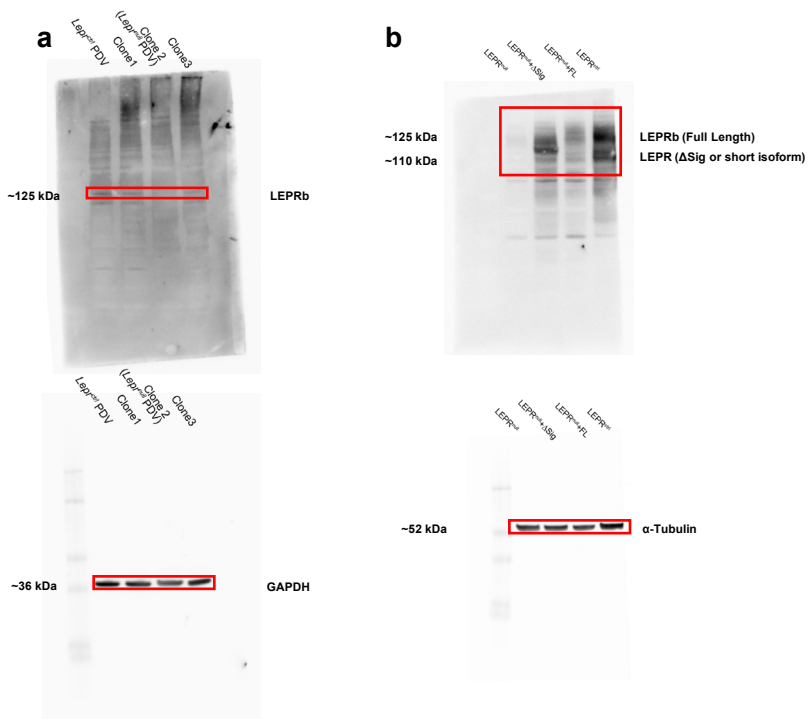

Supplementary Information Figure 2

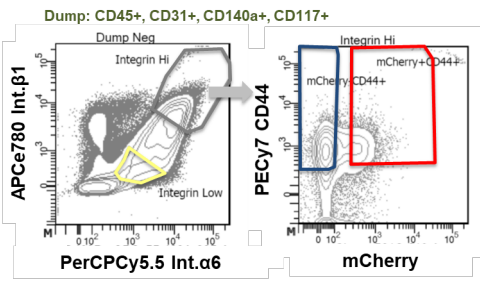

Supplementary Information Figure 3

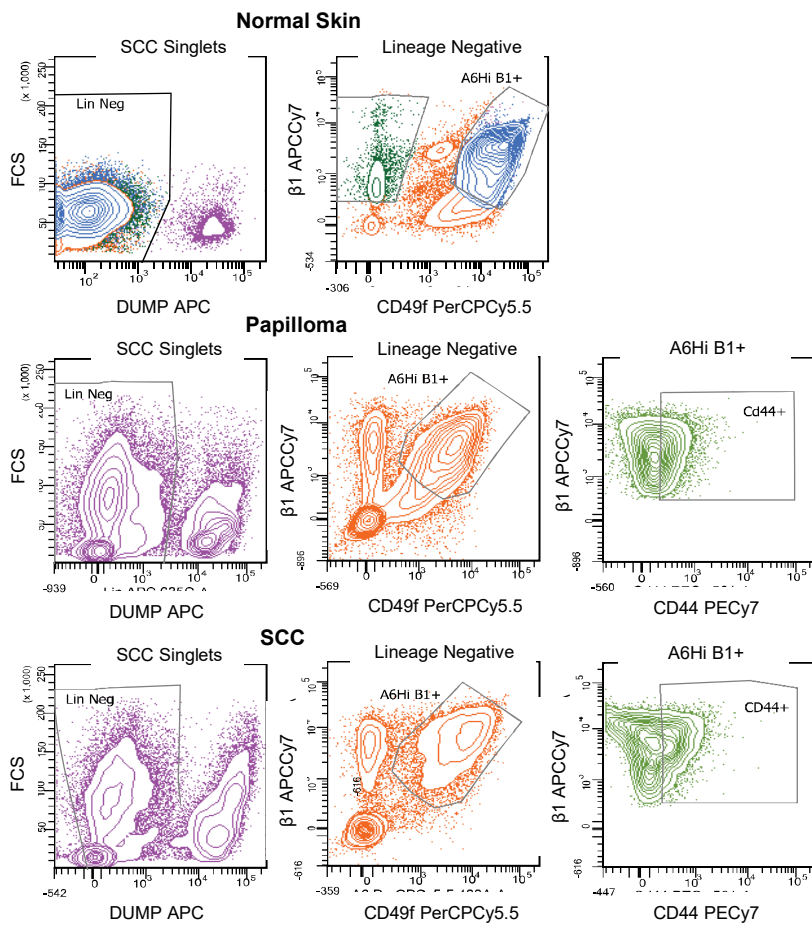

Supplementary Information Figure 4
